# Supplementary material for: Cardiac Myosin‐Binding Protein C to Diagnose Acute Myocardial Infarction in the Pre‐Hospital Setting
Source: PubMed Central journal article supplement (PMC6761674; doi:10.1161/jaha.119.013152), 2019-07-26
Supplement: JAH3-8-e013152-s001.pdf [file JAH3-8-e013152-s001.pdf]

# **SUPPLEMENTAL MATERIAL**

## **Data S1.**

### **Supplemental Methods**

#### **Sample storage and analysis**

The sample was initially stored at 4°C in the ambulance and later stored in refrigerators at Aarhus University Hospital. Laboratory personnel collected the blood samples from the refrigerators periodically at intervals of a maximum of 12h, centrifuged the samples, and stored the plasma at -80°C. The Central Denmark Region Committees on Biomedical Research Ethics reviewed the protocol and approved the study as a biological registry study. Handling of patient data and storage of the blood samples were reported to the Danish Data Protection agency. Clinical data were reviewed with permission from the Danish National Board of Health. Both high-sensitivity assays, hs-cTnT and cMyC, were performed using laboratory analysers on stored plasma samples. The POCT cTn readings are not included in our analysis.

#### **Data sources**

The cardiologist on call used a web-based telemedicine database to record clinical, baseline demographic and timing data, as well as the tentative diagnosis, ECG changes and triage decision. Timings were obtained from the Central Denmark Region's Prehospital Emergency Medical Services. Clinical details and demographic data were acquired using hard copies of patient files and from the National Patient Registry. Symptom duration was calculated using the difference between recorded symptom onset to prehospital blood sampling time point. Follow-up data to assess survival was obtained from The Danish Civil Registration System. electrocardiogram recorded.

## Supplemental Results

### STARD checklist

| Section & Topic   | No  | Item                                                                                                                                                   | Reported on page # |
|-------------------|-----|--------------------------------------------------------------------------------------------------------------------------------------------------------|--------------------|
| TITLE OR ABSTRACT | 1   | Identification as a study of diagnostic accuracy using at least one measure of accuracy (such as sensitivity, specificity, predictive values, or AUC)  | 3                  |
| ABSTRACT          | 2   | Structured summary of study design, methods, results, and conclusions (for specific guidance, see STARD for Abstracts)                                 | 3                  |
| INTRODUCTION      | 3   | Scientific and clinical background, including the intended use and clinical role of the index test                                                     | 5                  |
|                   | 4   | Study objectives and hypotheses                                                                                                                        | 6                  |
| METHODS           |     |                                                                                                                                                        |                    |
| Study design      | 5   | Whether data collection was planned before the index test and reference standard were performed (prospective study) or after (retrospective study)     | 6                  |
| Participants      | 6   | Eligibility criteria                                                                                                                                   | 6                  |
|                   | 7   | On what basis potentially eligible participants were identified (such as symptoms, results from previous tests, inclusion in registry)                 | 6                  |
|                   | 8   | Where and when potentially eligible participants were identified (setting, location and dates)                                                         | 6                  |
|                   | 9   | Whether participants formed a consecutive, random or convenience series                                                                                | 6                  |
| Test methods      | 10a | Index test, in sufficient detail to allow replication                                                                                                  | 7                  |
|                   | 10b | Reference standard, in sufficient detail to allow replication                                                                                          | 7                  |
|                   | 11  | Rationale for choosing the reference standard (if alternatives exist)                                                                                  |                    |
|                   | 12a | Definition of and rationale for test positivity cut-offs or result categories of the index test, distinguishing pre-specified from exploratory         | 7                  |
|                   | 12b | Definition of and rationale for test positivity cut-offs or result categories of the reference standard, distinguishing pre-specified from exploratory | 7                  |
|                   | 13a | Whether clinical information and reference standard results were available to the performers/readers of the index test                                 | 7                  |
|                   | 13b | Whether clinical information and index test results were available to the assessors of the reference standard                                          | 7                  |
| Analysis          | 14  | Methods for estimating or comparing measures of diagnostic accuracy                                                                                    | 8                  |

|                          |     |                                                                                                             |       |
|--------------------------|-----|-------------------------------------------------------------------------------------------------------------|-------|
|                          | 15  | How indeterminate index test or reference standard results were handled                                     | 8     |
|                          | 16  | How missing data on the index test and reference standard were handled                                      | 8     |
|                          | 17  | Any analyses of variability in diagnostic accuracy, distinguishing pre-specified from exploratory           | 8     |
|                          | 18  | Intended sample size and how it was determined                                                              |       |
| <b>RESULTS</b>           |     |                                                                                                             |       |
| Participants             | 19  | Flow of participants, using a diagram                                                                       |       |
|                          | 20  | Baseline demographic and clinical characteristics of participants                                           | 10    |
|                          | 21a | Distribution of severity of disease in those with the target condition                                      | 10    |
|                          | 21b | Distribution of alternative diagnoses in those without the target condition                                 | 10    |
| Test results             | 22  | Time interval and any clinical interventions between index test and reference standard                      | 10    |
|                          | 23  | Cross tabulation of the index test results (or their distribution) by the results of the reference standard |       |
|                          | 24  | Estimates of diagnostic accuracy and their precision (such as 95% confidence intervals)                     | 11-12 |
|                          | 25  | Any adverse events from performing the index test or the reference standard                                 |       |
| <b>DISCUSSION</b>        |     |                                                                                                             |       |
|                          | 26  | Study limitations, including sources of potential bias, statistical uncertainty, and generalisability       | 15    |
|                          | 27  | Implications for practice, including the intended use and clinical role of the index test                   | 15    |
| <b>OTHER INFORMATION</b> |     |                                                                                                             |       |
|                          | 28  | Registration number and name of registry                                                                    |       |
|                          | 29  | Where the full study protocol can be accessed                                                               |       |
|                          | 30  | Sources of funding and other support; role of funders                                                       | 16    |

**Table S1. cMyC precision profile.**

| <i>Expected (pg/mL)</i> | <i>Mean (pg/mL)</i> | <i>SD</i> | <i>CV (%)</i> |
|-------------------------|---------------------|-----------|---------------|
| 0                       | 0                   | 0.02      | 0             |
| 0.6                     | 1                   | 0.06      | 6             |
| 1.2                     | 1                   | 0.15      | 15            |
| 2.3                     | 2                   | 0.22      | 11            |
| 4.6                     | 5                   | 0.4       | 8             |
| 9.3                     | 9                   | 0.76      | 8.44          |
| 18.5                    | 19                  | 1.2       | 6.32          |
| 37                      | 35                  | 2.04      | 5.83          |
| 74.1                    | 71                  | 5.03      | 7.08          |
| 222.2                   | 236                 | 12.92     | 5.47          |
| 666.7                   | 703                 | 33.3      | 4.74          |
| 2000                    | 1998                | 67.87     | 3.4           |

see also figure S1

### **Point-of-Care Testing for cMyC – preliminary results**

Signal differentiation has been achieved for 10, 50 and 100 pg/mL of recombinant cMyC (C0C2 region). A combination of our antibodies 235-3H8 and 259-1A4 were used on paramagnetic and metal nano-particles (AgC and MgC) to achieve the signal (nanocoulomb) as demonstrated in figure S2.

**Table S2. Baseline characteristics stratified by final diagnosis.**

|                                              | All            | STEMI          | NSTEMI         | UA             | p-value for trend | N   |
|----------------------------------------------|----------------|----------------|----------------|----------------|-------------------|-----|
|                                              | N=776          | N=66           | N=107          | N=27           |                   |     |
| <i>Sex: male</i>                             | 473 (61%)      | 54 (82%)       | 75 (70%)       | 24 (89%)       | <0.001            | 776 |
| <i>Age (years)</i>                           | 68 [58;78]     | 66 [58;75]     | 74 [65;81]     | 63 [53;68]     | <0.001            | 776 |
| <i>Hypertension</i>                          | 439 (57%)      | 31 (47%)       | 71 (66%)       | 17 (63%)       | 0.062             | 776 |
| <i>Hyperlipidemia</i>                        | 622 (80%)      | 49 (74%)       | 93 (87%)       | 24 (89%)       | 0.103             | 776 |
| <i>Diabetes mellitus</i>                     | 147 (19%)      | 4 (6%)         | 19 (18%)       | 6 (22%)        | 0.04              | 776 |
| <i>Current smoking</i>                       | 230 (30%)      | 30 (45%)       | 35 (33%)       | 10 (37%)       | 0.003             | 776 |
| <i>History of smoking</i>                    | 217 (28%)      | 16 (24%)       | 34 (32%)       | 8 (30%)        | 0.264             | 776 |
| <i>Previous myocardial infarction</i>        | 232 (30%)      | 11 (17%)       | 47 (44%)       | 13 (48%)       | <0.001            | 776 |
| <i>Previous percutaneous intervention</i>    | 200 (26%)      | 10 (15%)       | 39 (36%)       | 14 (52%)       | <0.001            | 776 |
| <i>Systolic blood pressure (mmHg)</i>        | 146 [130; 166] | 141 [123; 168] | 150 [132; 177] | 154 [142; 169] | 0.152             | 764 |
| <i>Diastolic blood pressure (mmHg)</i>       | 87 [75; 99]    | 84 [72; 105]   | 91 [75; 104]   | 90 [84; 99]    | 0.208             | 764 |
| <i>Heart rate (beats/min)</i>                | 84 [70; 100]   | 81 [62; 95]    | 88 [74; 102]   | 84 [70; 100]   | 0.084             | 765 |
| <i>eGFR</i>                                  | 71 [56;86]     | 66 [61; 84]    | 70 [56; 82]    | 77 [66; 82]    | 0.455             | 605 |
| <i>Time since chest pain onset (minutes)</i> | 70 [35; 173]   | 71 [35; 140]   | 73 [39; 162]   | 44 [27; 125]   | 0.48              | 726 |

STEMI = ST elevation myocardial infarction; NSTEMI = Non-ST elevation myocardial infarction; UA = Unstable Angina; eGFR = Estimated glomerular filtration rate, ml/min/1.73m<sup>2</sup> (estimated using the Modification of Diet in Renal Disease (MDRD) formula)

**Table S3. Distribution of biomarker concentration by final adjudicated diagnostic category.**

|                                  | Minimum | 1 <sup>st</sup> Q | Median | Mean   | 3 <sup>rd</sup> Q | Maximum |
|----------------------------------|---------|-------------------|--------|--------|-------------------|---------|
| <b>cMyC (ambulance, ng/L)</b>    |         |                   |        |        |                   |         |
| <b>NSTEMI</b>                    | 6.6     | 42.4              | 88.0   | 554.1  | 253.1             | 11430   |
| <b>Other</b>                     | 1.9     | 9.1               | 17.4   | 62.8   | 42.7              | 6362    |
| <b>STEMI</b>                     | 7.9     | 48.6              | 306.3  | 1525.0 | 1706.0            | 19720   |
| <b>UA</b>                        | 6.8     | 10.7              | 19.4   | 21.6   | 24.8              | 64.72   |
| <b>hs-cTnT (ambulance, ng/L)</b> |         |                   |        |        |                   |         |
| <b>NSTEMI</b>                    | 5.2     | 18.0              | 32.6   | 122.3  | 71.8              | 2493.9  |
| <b>Other</b>                     | 3.0     | 6.7               | 9.6    | 20.2   | 19.7              | 1035.0  |
| <b>STEMI</b>                     | 5.5     | 14.7              | 58.1   | 375.6  | 295.3             | 4023.7  |
| <b>UA</b>                        | 3.4     | 7.3               | 9.3    | 11.3   | 13.8              | 26.5    |

STEMI = ST-elevation Myocardial Infarction; NSTEMI = Non ST-elevation Myocardial Infarction; UA = Unstable Angina

### **Correlation cMyC and hs-cTnT**

The biomarkers correlated positively across all patient groups ( $R^2=0.730$ ,  $r_s=0.855$ ) and for all patients with AMI ( $R^2=0.699$ ,  $r_s=0.836$ ). Table S3 and Figure S3 show the relationships between the biomarkers for each individual final adjudicated diagnosis. Serum concentrations of cMyC and hs-cTnT are positively correlated throughout, with strongest correlations observed in the non-cardiac and NSTEMI groups.

**Table S4. Correlations between cMyC and hs-cTnT concentrations by diagnostic group.**

| Diagnosis     | R <sup>2</sup> | f       | Spearman's rho | n   |
|---------------|----------------|---------|----------------|-----|
| <b>NSTEMI</b> | 0.897          | 913.56  | 0.947          | 107 |
| <b>Other</b>  | 0.897          | 5000.05 | 0.947          | 576 |
| <b>STEMI</b>  | 0.631          | 109.61  | 0.795          | 66  |
| <b>UAP</b>    | 0.453          | 20.73   | 0.673          | 27  |

R<sup>2</sup> = correlation coefficient



**Table S5. AUC values for cMyC vs hs-cTnT stratified by time since symptom onset: for early ( $\leq 60$  mins), intermediate (60-120 mins), late ( $\geq 120$  mins) presenters.**

| Subgroup        | cMyC AUC | 95% CI      | hs-cTnT AUC | 95% CI      | AMI | controls | p-value* |
|-----------------|----------|-------------|-------------|-------------|-----|----------|----------|
| $\leq 60$ mins  | 0.782    | 0.721-0.838 | 0.747       | 0.682-0.809 | 66  | 255      | 0.0528   |
| 60-120 mins     | 0.857    | 0.794-0.916 | 0.828       | 0.763-0.893 | 51  | 105      | 0.0917   |
| $\geq 120$ mins | 0.897    | 0.846-0.941 | 0.889       | 0.843-0.93  | 52  | 197      | 0.6349   |

CI = confidence interval; \* p value for direct comparison AUC cMyC to hs-cTnT

**Table S6. Logistic regression model statistics for derivation of figure S7.**

*Logistic Regression Model*

|                              | Model Likelihood Ratio Test | Discrimination Indexes | Rank Discrimination Indexes |
|------------------------------|-----------------------------|------------------------|-----------------------------|
| <i>Obs</i>                   | 776                         | LR chi2 282.57         | R2 0.467                    |
| <i>0</i>                     | 603                         | d.f. 10                | g 2.106                     |
| <i>1</i>                     | 173                         | Pr(>chi2) <0.0001      | gr 8.216                    |
| <i>max  deriv </i>           | 2.00E-09                    |                        | gp 0.256                    |
|                              |                             | Brier 0.108            | tau-a 0.255                 |
|                              | Coef                        | S.E.                   | Wald Z Pr(> Z )             |
| <i>Intercept</i>             | -6.8037                     | 1.1121                 | -6.12 <0.0001               |
| <i>MyC_0h</i>                | 1.7063                      | 0.3436                 | 4.97 <0.0001                |
| <i>MyC_0h'</i>               | -0.7735                     | 0.4137                 | -1.87 0.0615                |
| <i>Creatinine</i>            | -0.0062                     | 0.0023                 | -2.76 0.0057                |
| <i>Sex = male</i>            | 0.7497                      | 0.2579                 | 2.91 0.0036                 |
| <i>Age (y)</i>               | -0.0138                     | 0.0094                 | -1.46 0.1438                |
| <i>DM history = Yes</i>      | -0.9084                     | 0.3109                 | -2.92 0.0035                |
| <i>Chol history = Yes</i>    | 0.3898                      | 0.3082                 | 1.26 0.2059                 |
| <i>HTN history = Yes</i>     | 0.1877                      | 0.2425                 | 0.77 0.4389                 |
| <i>Previous MI = Yes</i>     | -0.2726                     | 0.2446                 | -1.11 0.2650                |
| <i>Smoking history = Yes</i> | 0.6093                      | 0.2832                 | 2.15 0.0314                 |

C = area under ROC curve, Dxy = Somers' D<sub>{xy}</sub>, gamma = Goodman-Kruskal gamma, tau-a = Kendall's tau-a rank correlations between predicted probabilities and observed response, R<sup>2</sup> = Nagelkerke index, Brier score with respect to Y > its lowest level, g = Gini's mean difference (g-index), gr = g-index on the odds ratio scale, gp = g-index on the probability scale using same cut-off as used for Brier score

**Table S7. Logistic regression models incorporating all variables, or cMyC and hs-cTnT alone.**

| <i>Predictors used</i>                | <i>LR <math>\chi^2</math></i> | <i>Adequacy</i> |
|---------------------------------------|-------------------------------|-----------------|
| <i>cMyC + clinical information</i>    | 282.4                         | 0.97            |
| <i>Hs-cTnT + clinical information</i> | 256.9                         | 0.88            |
| <i>Combined</i>                       | 291.5                         | 1.00            |

**Table S8. Logistic regression model statistics for cMyC.**

| <i>cMyC short model</i>     | <i>Model Likelihood Ratio Test</i> |           | <i>Discrimination Indexes</i> |          | <i>Rank Discrim. Indexes</i> |       |       |
|-----------------------------|------------------------------------|-----------|-------------------------------|----------|------------------------------|-------|-------|
| <i>Obs</i>                  | 776                                | LR chi2   | 246.49                        | R2       | 0.416                        | C     | 0.852 |
| <i>0</i>                    | 603                                | d.f.      | 5                             | g        | 1.911                        | Dxy   | 0.703 |
| <i>1</i>                    | 173                                | Pr(>chi2) | <0.0001                       | gr       | 6.762                        | gamma | 0.703 |
| <i>max /deriv/</i>          | 1e-11                              |           |                               | gp       | 0.243                        | tau-a | 0.244 |
|                             |                                    |           |                               | Brier    | 0.117                        |       |       |
|                             | Coef                               | S.E.      | Wald Z                        | Pr(> Z ) |                              |       |       |
| <i>Intercept</i>            | -7.2658                            | 0.998     | -7.28                         | <0.0001  |                              |       |       |
| <i>MyC_0h</i>               | 1.4225                             | 0.3136    | 4.54                          | <0.0001  |                              |       |       |
| <i>MyC_0h'</i>              | -0.6451                            | 0.3743    | -1.72                         | 0.0848   |                              |       |       |
| <i>Sex=male</i>             | 0.6316                             | 0.2397    | 2.63                          | 0.0084   |                              |       |       |
| <i>Chol history =Yes</i>    | 0.2214                             | 0.282     | 0.79                          | 0.4323   |                              |       |       |
| <i>Smoking history =Yes</i> | 0.5677                             | 0.2671    | 2.13                          | 0.0336   |                              |       |       |

C = area under ROC curve, Dxy = Somers'  $D_{\{xy\}}$ , gamma = Goodman-Kruskal gamma, tau-a = Kendall's tau-a rank correlations between predicted probabilities and observed response,  $R^2$  = Nagelkerke index, Brier score with respect to  $Y >$  its lowest level, g = Gini's mean difference (g-index), gr = g-index on the odds ratio scale, gp = g-index on the probability scale using same cut-off as used for Brier score

Using bootstrap resampling for validation, we observed modest optimism and slightly lower corrected rank discrimination indices (table S9). There were no significant interactions.

**Table S9. Validation of short cMyC model used for nomogram derivation.**

|                        | index.orig | training | test   | optimism | index.corrected |
|------------------------|------------|----------|--------|----------|-----------------|
| <i>C</i>               | 0.851      | 0.854    | 0.849  | 0.005    | 0.846           |
| <i>Dxy</i>             | 0.703      | 0.708    | 0.698  | 0.011    | 0.692           |
| <i>R2</i>              | 0.416      | 0.422    | 0.408  | 0.014    | 0.402           |
| <i>Intercept</i>       | 0.000      | 0.000    | -0.029 | 0.029    | -0.029          |
| <i>Slope</i>           | 1.000      | 1.000    | 0.967  | 0.033    | 0.967           |
| <i>E<sub>max</sub></i> | 0.000      | 0.000    | 0.013  | 0.013    | 0.013           |
| <i>D</i>               | 0.316      | 0.322    | 0.309  | 0.013    | 0.304           |
| <i>U</i>               | -0.003     | -0.003   | 0.000  | -0.003   | 0.000           |
| <i>Q</i>               | 0.319      | 0.324    | 0.309  | 0.015    | 0.304           |
| <i>B</i>               | 0.118      | 0.117    | 0.119  | -0.003   | 0.121           |
| <i>g</i>               | 1.911      | 1.954    | 1.880  | 0.074    | 1.837           |
| <i>gp</i>              | 0.2434     | 0.2441   | 0.2406 | 0.0035   | 0.2399          |

C = area under ROC curve, Dxy = Somers'  $D_{\{xy\}}$ , gamma = Goodman-Kruskal gamma, tau-a = Kendall's tau-a rank correlations between predicted probabilities and observed response,  $R^2$  = Nagelkerke index, Brier score with respect to  $Y >$  its lowest level, g = Gini's mean difference (g-index), gr = g-index on the odds ratio scale, gp = g-index on the probability scale using same cut-off as used for Brier score

**Table S10. Discriminatory power of cMyC at different thresholds.**

| <b>cMyC Diagnostic proportions - all patients</b> |                    |                    |                    |
|---------------------------------------------------|--------------------|--------------------|--------------------|
| <b>[cMyC]</b>                                     | <b>10 ng/L</b>     | <b>87 ng/L</b>     | <b>120 ng/L</b>    |
| <b>Sensitivity</b>                                | 96.6% (93.5-98.9%) | 54.7% (47.6-62.1%) | 46.1% (38.7-53.7%) |
| <b>Specificity</b>                                | 29.2% (25.5-33%)   | 90.2% (87.6-92.6%) | 92.2% (90-94.3%)   |
| <b>NPV</b>                                        | 96.8% (93.8-99%)   | 87.4% (84.7-90%)   | 85.6% (82.7-88.2%) |
| <b>PPV</b>                                        | 28.1% (24.5-31.8%) | 61.4% (54-69.6%)   | 62.7% (54.6-71.3%) |

Diagnostic proportions of cMyC and hs-cTnT. NPV = Negative Predictive Value; PPV = Positive Predictive Value

**Table S11. Discriminatory power of hs-cTnT at different thresholds – stratified by time since chest pain onset.**

| <b>Patients with chest pain for &lt;60 mins</b> |                    |                    |                    |                    |
|-------------------------------------------------|--------------------|--------------------|--------------------|--------------------|
| <b>[hs-cTnT]</b>                                | <b>5 ng/L</b>      | <b>14 ng/L</b>     | <b>50 ng/L</b>     | <b>52 ng/L</b>     |
| <b>Sensitivity</b>                              | 100% (100-100%)    | 66.7% (54.8-77%)   | 27.3% (17.4-38.2%) | 27.3% (17.4-38.2%) |
| <b>Specificity</b>                              | 13.8% (9.7-18%)    | 67.1% (61.1-72.7%) | 94.2% (91-96.9%)   | 94.2% (91-96.9%)   |
| <b>NPV</b>                                      | 100% (100-100%)    | 88.8% (83.7-92.7%) | 83.6% (79.2-87.6%) | 83.6% (79.2-87.6%) |
| <b>PPV</b>                                      | 22.9% (17.9-28%)   | 34.1% (26-42.7%)   | 54.8% (36.7-71.9%) | 54.8% (36.7-71.9%) |
| <b>Patients with chest pain for 60-120 mins</b> |                    |                    |                    |                    |
| <b>Sensitivity</b>                              | 100% (100-100%)    | 84.5% (72.7-93.8%) | 39.3% (25.5-52.8%) | 39.3% (25.5-52.8%) |
| <b>Specificity</b>                              | 7.5% (2.9-13.5%)   | 65.1% (55.8-73.8%) | 93.6% (88.2-98.1%) | 94.6% (89.6-98.9%) |
| <b>NPV</b>                                      | 100% (100-100%)    | 89.8% (82.1-95.9%) | 76% (68.9-82.8%)   | 76.2% (69-83%)     |
| <b>PPV</b>                                      | 34.5% (27-42.1%)   | 53.8% (43-65.3%)   | 75% (57.7-91.7%)   | 78.2% (60.7-93.3%) |
| <b>Patients with chest pain for ≥120 mins</b>   |                    |                    |                    |                    |
| <b>Sensitivity</b>                              | 100% (100-100%)    | 94.3% (86-100%)    | 57.9% (43.5-71.1%) | 56% (41.8-68.8%)   |
| <b>Specificity</b>                              | 15.8% (11.2-20.8%) | 62.3% (55.7-69.6%) | 92.5% (88.7-95.8%) | 93% (89.2-96.2%)   |
| <b>NPV</b>                                      | 100% (100-100%)    | 97.7% (94.6-100%)  | 89.3% (84.7-93.3%) | 89% (84.4-92.8%)   |
| <b>PPV</b>                                      | 23.6% (18.3-29.6%) | 39.7% (30.9-48.4%) | 66.7% (52.4-80%)   | 67.4% (52.5-81.6%) |

NPV = Negative Predictive Value; PPV = Positive Predictive Value

**Table S12. Discriminatory power of hs-cTnT at different thresholds – for all patients.**

| <b>hs-cTnT Diagnostic proportions - all patients</b> |                    |                    |                    |                    |
|------------------------------------------------------|--------------------|--------------------|--------------------|--------------------|
| <b>[hs-cTnT]</b>                                     | <b>5 ng/L</b>      | <b>14 ng/L</b>     | <b>50 ng/L</b>     | <b>52 ng/L</b>     |
| <b>Sensitivity</b>                                   | 100% (100-100%)    | 80.5% (73.8-86.3%) | 40.4% (33.3-48.4%) | 40% (32.7-47.6%)   |
| <b>Specificity</b>                                   | 13.4% (10.8-16.2%) | 65.1% (61.4-68.9%) | 93.5% (91.2-95.3%) | 93.8% (91.7-95.6%) |
| <b>NPV</b>                                           | 100% (100-100%)    | 92.1% (89.4-94.6%) | 84.6% (81.8-87.5%) | 84.5% (81.5-87.4%) |
| <b>PPV</b>                                           | 24.7% (21.5-28.2%) | 39.7% (34.3-45%)   | 63.9% (54.6-72.7%) | 64.7% (55.4-74%)   |

NPV = Negative Predictive Value; PPV = Positive Predictive Value



**Table S13. Reclassification analysis for cMyC vs hs-cTnT.**

| hs-cTnT         | cMyC    |                                          |         |              | AMI      |         |         |              |
|-----------------|---------|------------------------------------------|---------|--------------|----------|---------|---------|--------------|
|                 | Non-AMI | Observe                                  | Rule-In | Reclassified | Rule-Out | Observe | Rule-In | Reclassified |
| Rule-Out        | 20      | 4                                        | 0       | 17%          | 0        | 0       | 0       | 0%           |
| Observe         | 39      | 485                                      | 17      | 10%          | 0        | 91      | 13      | 12%          |
| Rule-In         | 0       | 8                                        | 30      | 21%          | 0        | 2       | 67      | 3%           |
| NRI categorical |         | 0.1067 (95% CI, 0.0563-0.1571); p <0.001 |         |              |          |         |         |              |
| IDI             |         | 0.032 (95% CI, 0.0168-0.0472); p <0.001  |         |              |          |         |         |              |

Reclassification analysis for cMyC and hs-cTnT in a Net Reclassification Table; based on sensitivity & NPV of cMyC in the cohort, patients were eligible for rule-out with chest pain >120 mins and cMyC <10 ng/L at first blood draw; rule-in if cMyC  $\geq$ 120 ng/L. For hs-cTnT, the triage was modelled on a first blood draw as per ESC 0/1h-algorithm – direct rule-out if chest pain  $\geq$  180 mins and hs-cTnT < 5 ng/L; rule-in if hs-cTnT  $\geq$ 52 ng/L. NRI = Net Reclassification Benefit; IDI = Integrated Discrimination Improvement

**Table S14. Prediction of death and first non-fatal MI/death during follow-up.**

*Model i) Death during FU*

|                       | Model Tests |            |        | Discrimination Indexes |       |
|-----------------------|-------------|------------|--------|------------------------|-------|
| <i>Obs</i>            | 769         | LR chi2    | 110.83 | R2                     | 0.179 |
| <i>Events</i>         | 81          | d.f.       | 5      | C                      | 0.798 |
| <i>Center</i>         | 6.94        | Pr(>chi2)  | 0      | Dxy                    | 0.597 |
|                       |             | Score chi2 | 123.33 | g                      | 1.71  |
|                       |             | Pr(>chi2)  | 0      | gr                     | 5.527 |
|                       | Coef        | S.E.       | Wald Z | Pr(> Z )               |       |
| <i>MyC_0h</i>         | 0.892       | 0.417      | 2.140  | 0.032                  |       |
| <i>MyC_0h'</i>        | -0.644      | 0.446      | -1.450 | 0.148                  |       |
| <i>creatinine</i>     | 0.002       | 0.001      | 2.540  | 0.011                  |       |
| <i>age_y</i>          | 0.058       | 0.012      | 4.930  | <0.0001                |       |
| <i>previousMI=Yes</i> | 0.582       | 0.226      | 2.570  | 0.010                  |       |

*Model ii) Non-fatal AMI or Death during FU*

|                    | Model Tests |            |        | Discrimination Indexes |       |
|--------------------|-------------|------------|--------|------------------------|-------|
| <i>Obs</i>         | 771         | LR chi2    | 285.66 | R2                     | 0.317 |
| <i>Events</i>      | 228         | d.f.       | 3      | C                      | 0.828 |
| <i>Center</i>      | 4.8164      | Pr(>chi2)  | 0      | Dxy                    | 0.656 |
|                    |             | Score chi2 | 405.45 | g                      | 1.558 |
|                    |             | Pr(>chi2)  | 0      | gr                     | 4.75  |
|                    | Coef        | S.E.       | Wald Z | Pr(> Z )               |       |
| <i>MyC_0h</i>      | 1.633       | 0.224      | 7.300  | <0.0001                |       |
| <i>MyC_0h'</i>     | -1.173      | 0.239      | -4.900 | <0.0001                |       |
| <i>dm_base=Yes</i> | -0.407      | 0.174      | -2.340 | 0.019                  |       |

Model statistics to predict probability of i) death and ii) non-fatal AMI or death during follow-up

**Table S15. Cox regression model for outcome death.**

| <i>Variable</i>                  | <i>HR</i>                               | <i>95% CI</i> | <i>p-value</i> |
|----------------------------------|-----------------------------------------|---------------|----------------|
| <i>[creatinine]</i>              | 1.002                                   | 1.001-1.004   | 0.003          |
| <i>previous MI =<br/>Yes</i>     | 1.794                                   | 1.120-2.872   | 0.015          |
| <i>log [cMyC]</i>                | 1.355                                   | 1.193-1.54    | <0.001         |
| <i>Age (years)</i>               | 1.07                                    | 1.045-1.095   | <0.001         |
| <i>Likelihood ratio<br/>test</i> | 101.6 on 4 degrees of freedom, p <0.001 |               |                |
| <i>Wald test</i>                 | 89.17 on 4 degrees of freedom, p <0.001 |               |                |

Cox regression model for outcome death during 2-year follow-up, for variables used in the nomogram creation;  
HR = hazard ratio; CI = confidence interval

**Figure S1. cMyC assay precision profile.**

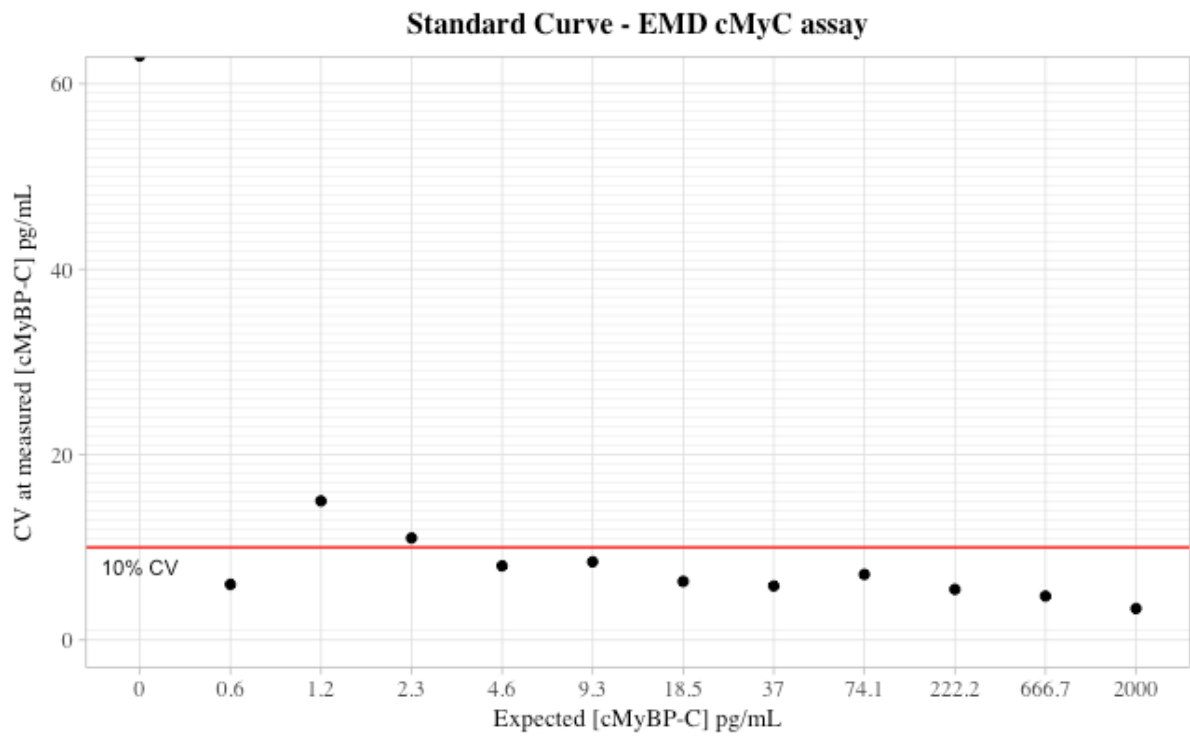

**Figure S2. Signal obtained for AgC (235-3H8) against MgC (259-1A4) for varying concentrations of C0C2 analyte.**

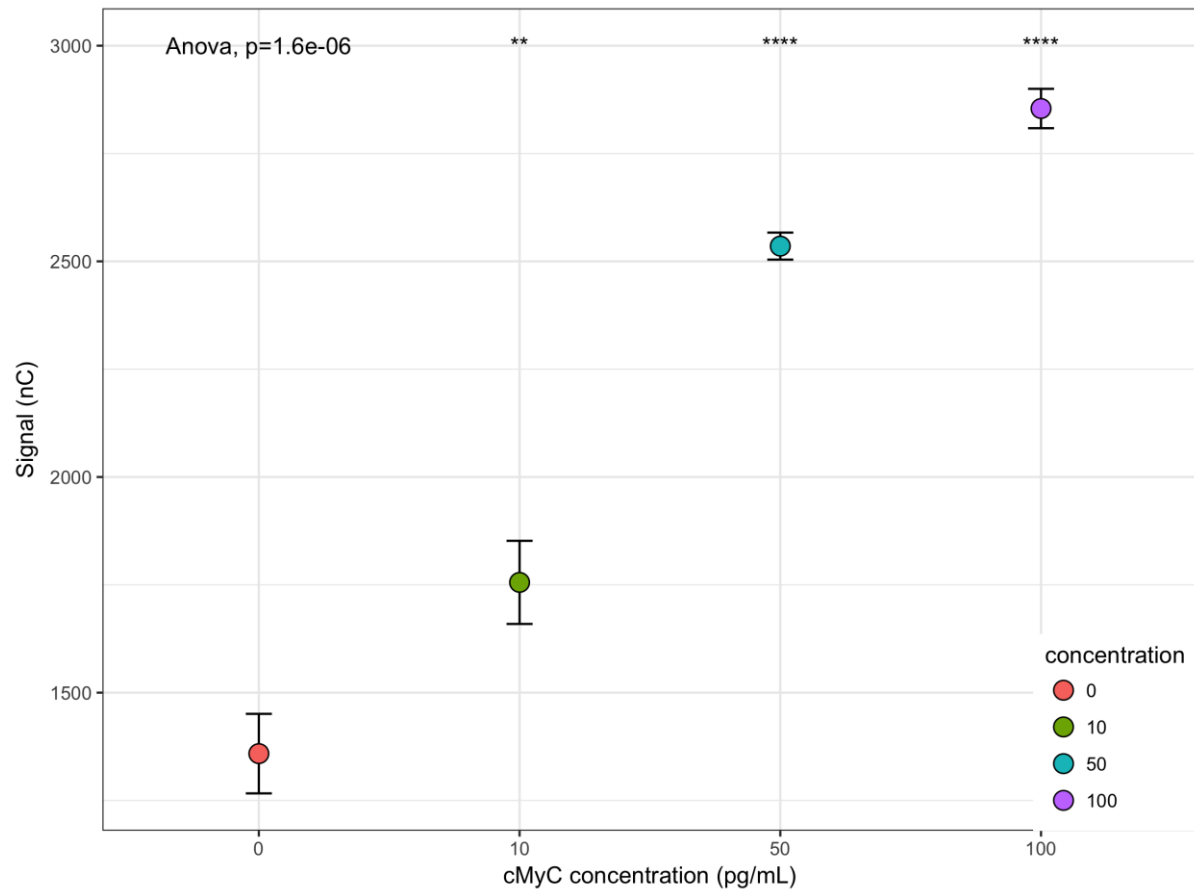

Points represent mean concentration, error bars the standard error of the mean. Significance tests have been performed comparing all groups (Anova, as printed) and as unpaired T-test against concentration 0: \*\*:  $p \leq 0.01$ ; \*\*\*\*:  $p \leq 0.0001$ ; CV: 10% at 10 pg/mL; 2% at 50 pg/mL, 3% at 100 pg/mL

**Figure S3. Scatter plots outlining correlation between cMyC and hs-cTnT concentrations (ng/L both) in samples obtained in the ambulance for each diagnostic group.**

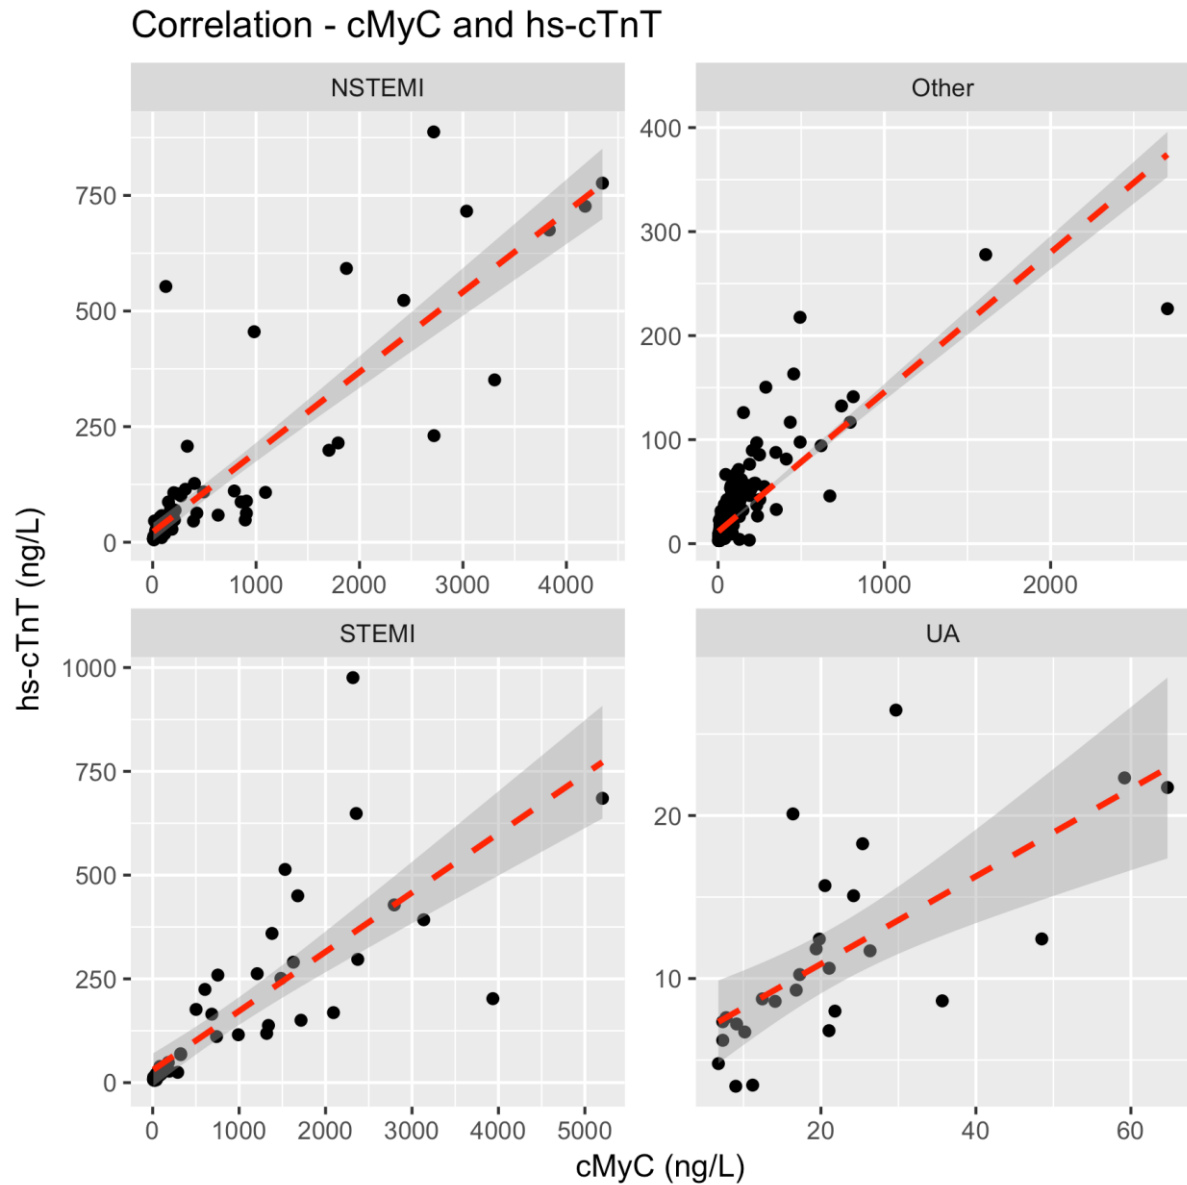

Light grey shading depicts the boundaries of the 95% confidence intervals, line of best fit indicated in red. NSTEMI = Non-ST elevation Myocardial Infarction; STEMI = ST-elevation Myocardial Infarction; UA = Unstable Angina



**Figure S5. Receiver-operating characteristics (ROC) curves for cMyC (ambulance) and hs-cTnT (ambulance) for the diagnosis of NSTEMI.**

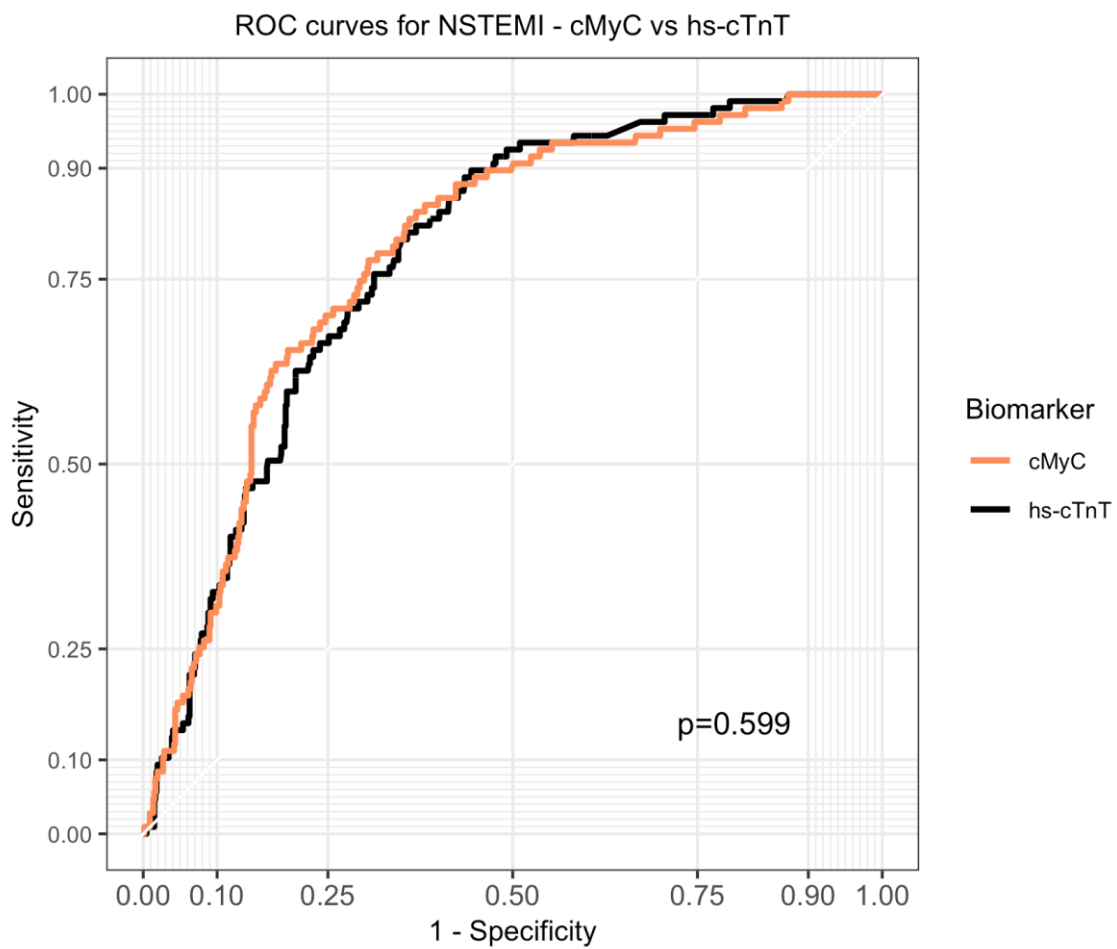

The AUC for cMyC 0.787 (95% CI, 0.741-0.829), for hs-cTnT 0.781 (95% CI, 0.737-0.820; p=0.595 for direct comparison to cMyC).



**Figure S6. Receiver-operating characteristics (ROC) curves for cMyC (ambulance) and hs-cTnT (ambulance) for the diagnosis of STEMI.**

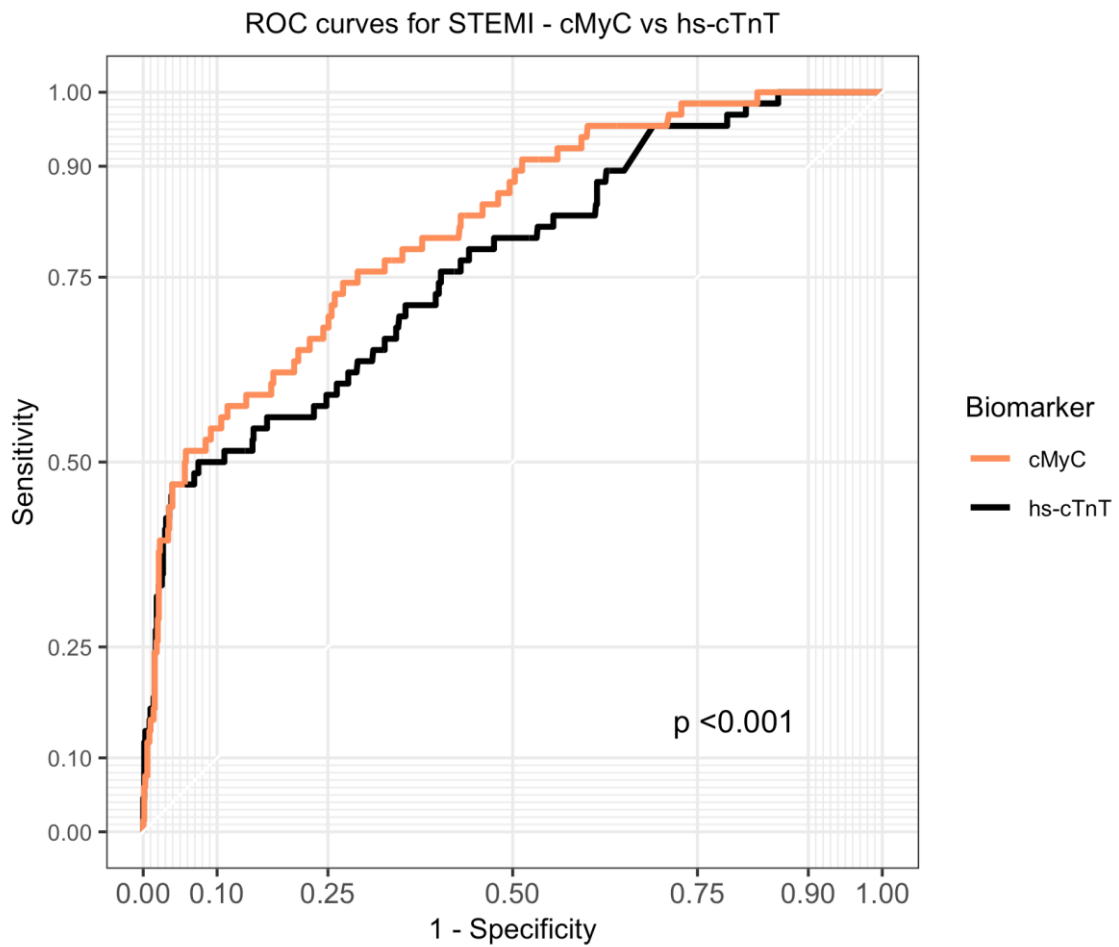

The AUC for cMyC was 0.816 (95% CI, 0.761-0.866), for hs-cTnT 0.766 (95% CI, 0.701-0.828;  $p < 0.001$  for direct comparison to cMyC).

**Figure S7. Odds ratio for AMI diagnosis at presentation based on [cMyC] and stratified by [creatinine]; faceted by sex (horizontal), and history of diabetes mellitus (vertical); other variables held stable.**

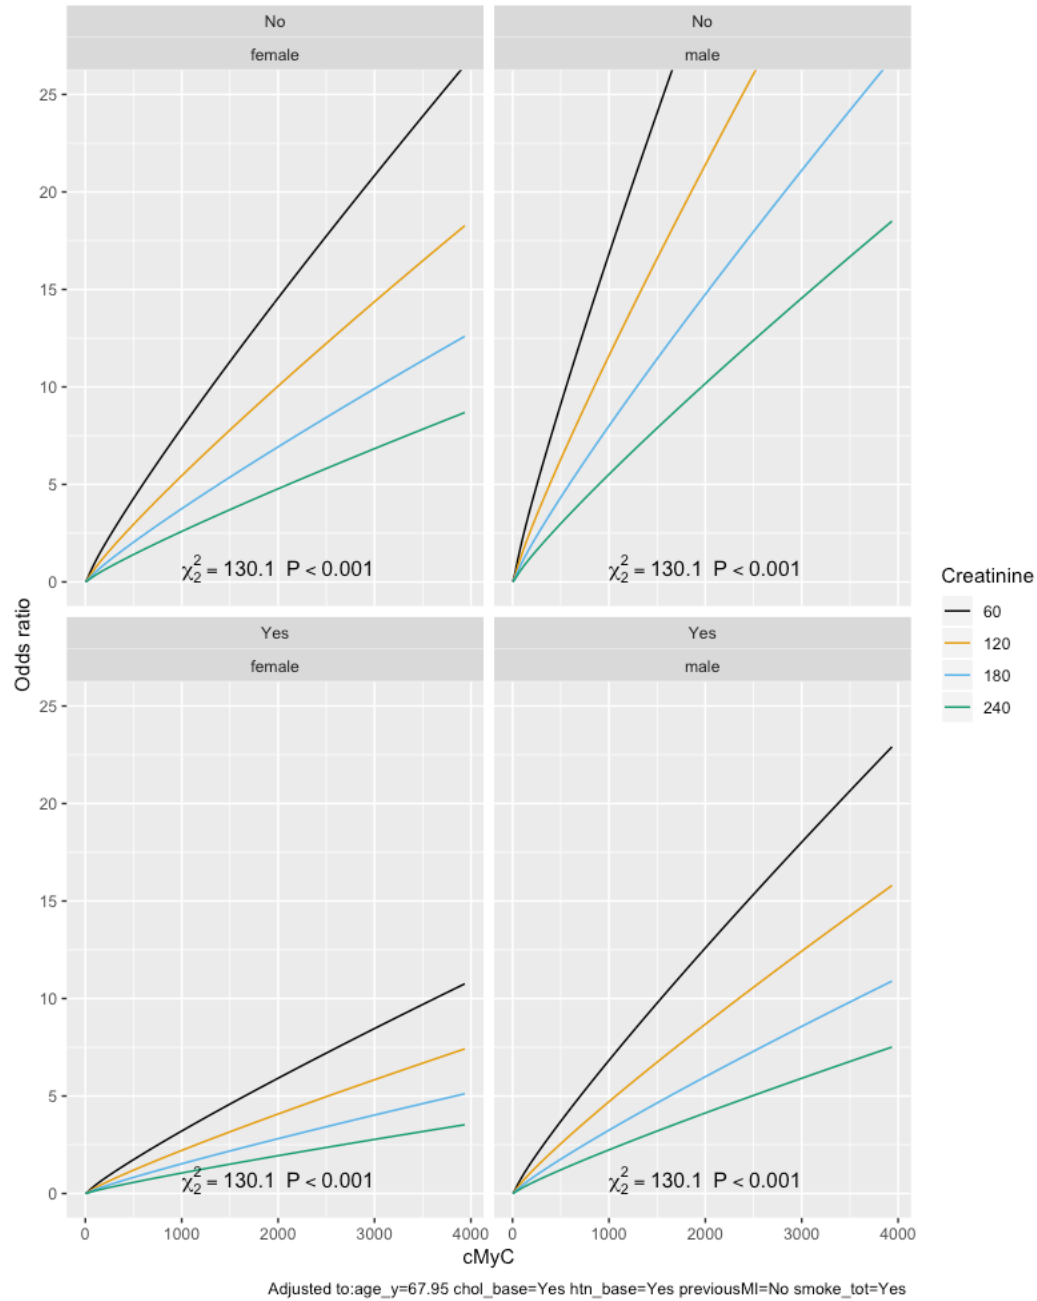

The model was derived using a multivariable logistic regression model as outlined in table S5.

**Figure S8. Calibration plot for complete model, validated using 150 bootstrap repetitions.**

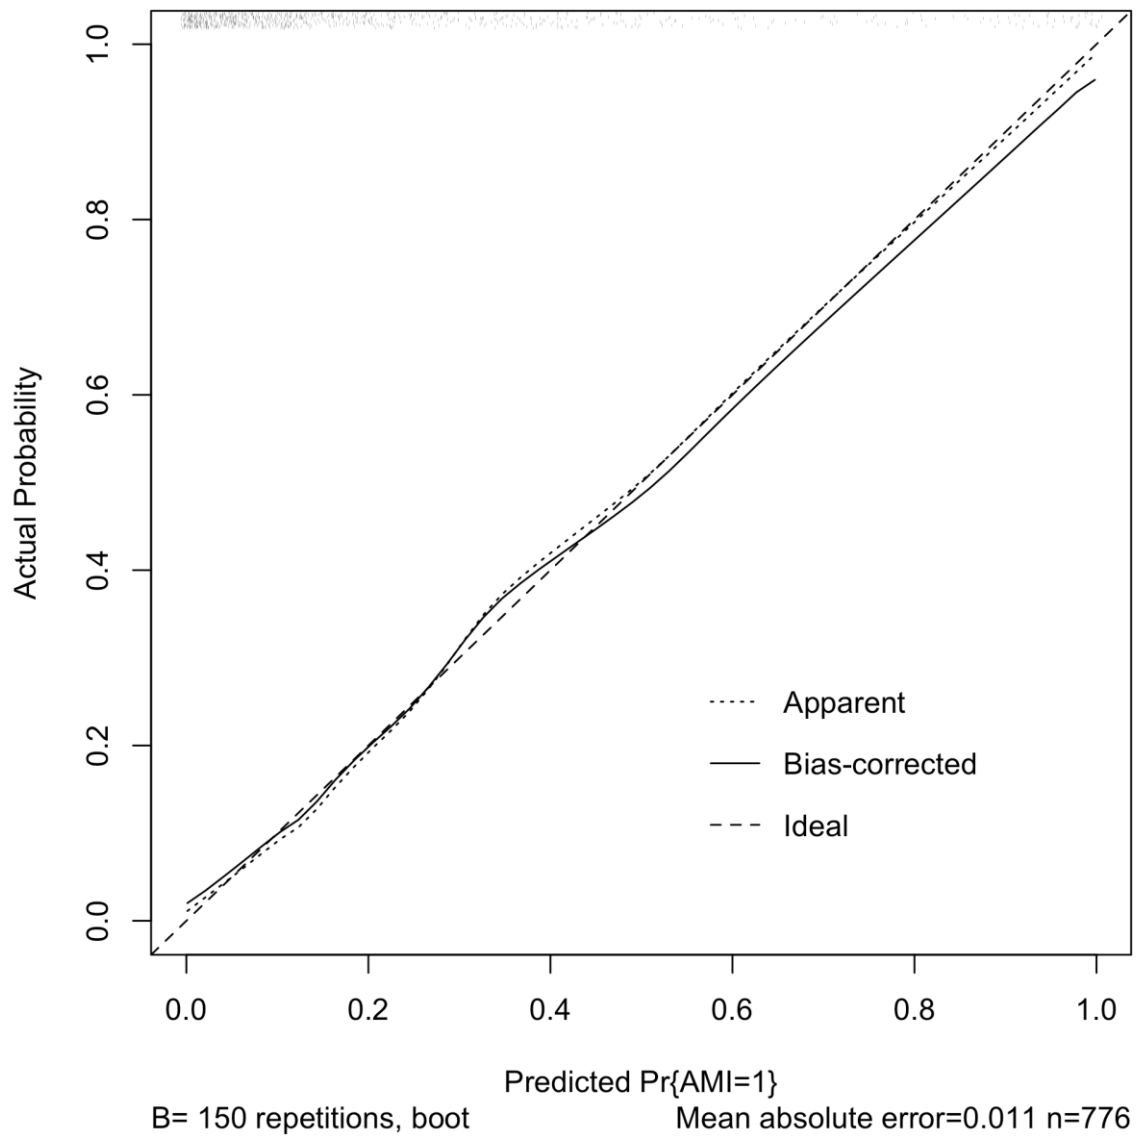

A nonparametric calibration curve is estimated over a sequence of predicted values.

**Figure S9. Nomogram for the use of cMyC concentration, creatinine concentration, age and history of prior myocardial infarction to predict probability of death during follow-up.**

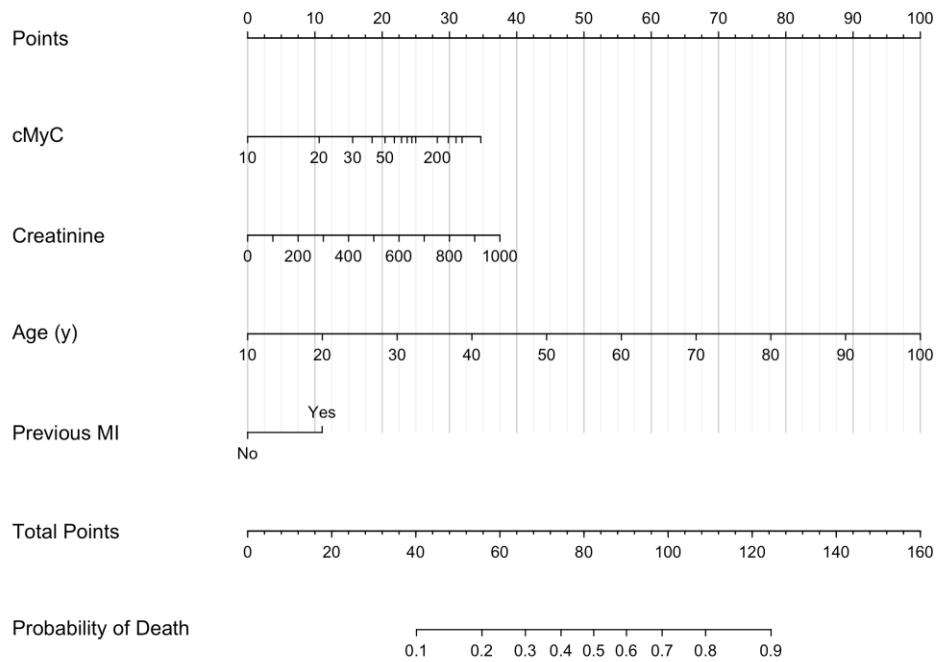

Each variable scores on the points scale on top of the nomogram, and the respective values are added up to the complete score – the total point scale then allows to transfer the sum of all predictors to scale for the ‘probability of death’ during 2-year follow-up.

**Figure S10. Nomogram for the use of cMyC concentration and history of diabetes mellitus to predict probability of non-fatal MI or death during follow-up.**

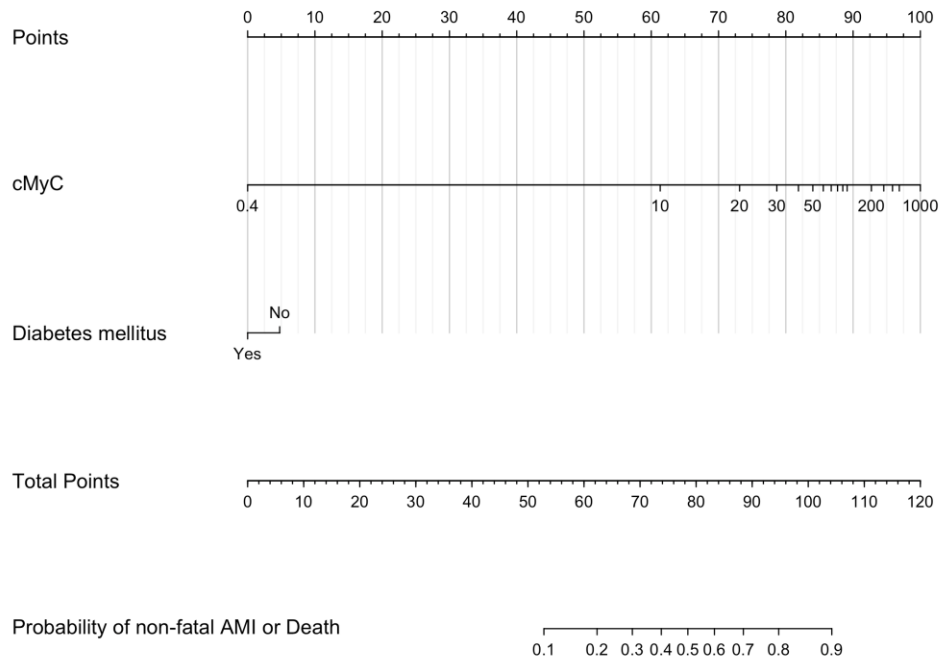

Each variable scores on the points scale on top of the nomogram, and the respective values are added up to the complete score – the total point scale then allows to transfer the sum of all predictors to scale for the ‘probability of death’ during 2-year follow-up.

**Figure S11. Facet plots describing effect of increasing cMyC concentration and prior myocardial infarction on the probability of death during follow-up.**

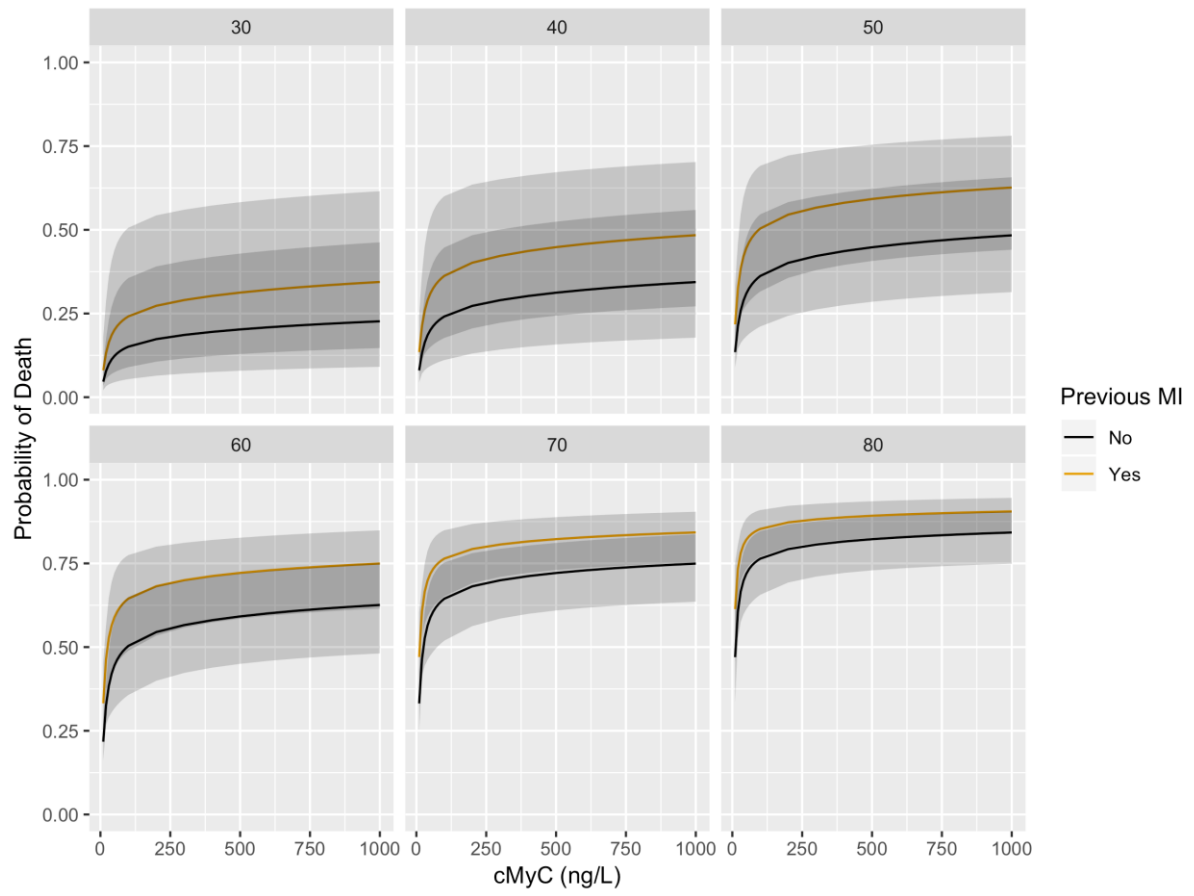

Facets represent age categories.

**Figure S12. Cumulative event (mortality) curves for all patients over a 2-year follow-up for cMyC from samples obtained in the ambulance.**

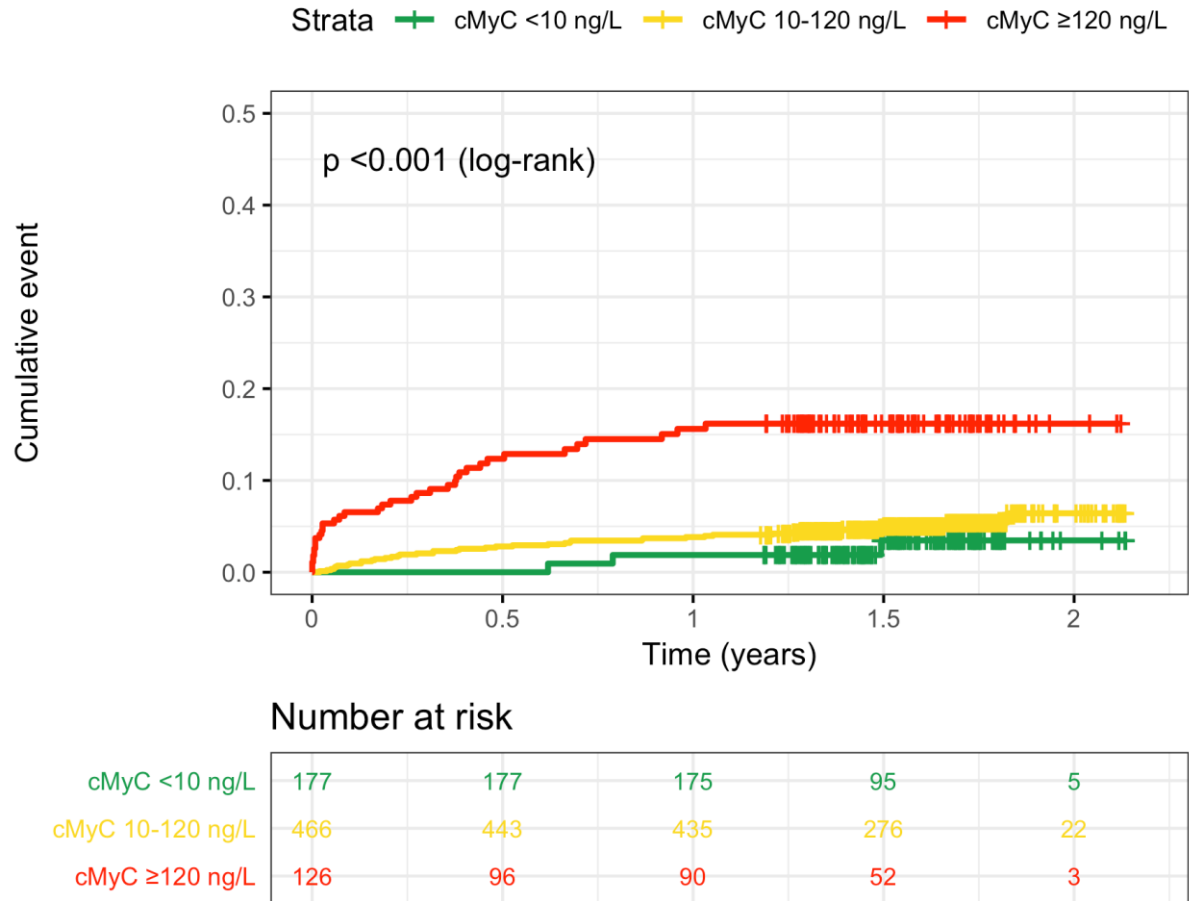

These are adjusted for the Cox model (using age (in years), presence of baseline diabetes mellitus and prior myocardial infarction as significant covariates) and stratified for the following cMyC levels: <10 ng/L, 10-120 ng/L, ≥120 ng/L.
